# Supplementary material for: Production of single cell oil by Yarrowia lipolytica JCM 2320 using detoxified desiccated coconut residue hydrolysate
Source: PeerJ. 2022 Mar 1;10:e12833. doi: 10.7717/peerj.12833 (PMC8896024; doi:10.7717/peerj.12833)
Supplement: Supplemental Information 1 [file peerj-10-12833-s001.xlsx]

## Sheet: PRETREATMENT
Pretreatment with Sulphuric Acid (Acidic)
Concentration of H2SO4	Reducing sugar 1 (g/L)	Reducing sugar 2 (g/L)	Reducing sugar 3 (g/L)	Total Reducing Sugar (g/L)	Standard Deviation
0.005	20.118	21.001	20.811	20.6433	0.464765
0.01	22.176	22.312	21.088	21.8587	0.670872
0.02	25.326	25.891	26.731	25.9827	0.706971
0.03	14.939	15.001	14.871	14.937	0.0650231
0.05	11.944	12.289	12.198	12.1437	0.178802
0.06	11.534	11.555	12.352	11.8137	0.466329
0.08	10.147	8.112	8.533	8.93067	1.0742
0.1	7.42	5.31	6.12	6.28333	1.06444
Pretreament with Sodium Hydroxide (Alkaline)
Concentration of NaOH	Reducing sugar 1 (g/L)	Reducing sugar 2 (g/L)	Reducing sugar3 (g/L)	Total Reducing Sugar (g/L)	Standard Deviation
0.005	0.484	0.333	0.414	0.410333	0.0755667
0.01	0.626	0.611	0.566	0.601	0.031225
0.02	1.304	1.208	1.312	1.27467	0.0578734
0.03	0.862	0.869	0.717	0.816	0.0858079
0.05	1.398	1.489	1.365	1.41733	0.064221
0.06	0.988	0.998	0.888	0.958	0.0608276
0.08	1.304	1.214	1.365	1.29433	0.0759627
0.1	1.335	1.573	1.445	1.451	0.119113

## Sheet: INHIBITORY STUDY
Furfural
Optical Density
CONTROL (without inhibitors)							At 0.5 g/L (0.0375 mL furfural in 0.0750 L media)							At 1.0 g/L (0.075 mL furfural in 0.0750 L media)							At 2.0 g/L (0.150 mL furfural in 0.0750 L media)							At 3.0 g/L (0.225 mL furfural in 0.0750 L media)							At 4.0 g/L (0.300 mL furfural in 0.0750 L media)							At 5.0 g/L (0.375 mL furfural in 0.0750 L media)
	1st reading	2nd reading	3rd reading	Average	STDEV			1st reading	2nd reading	3rd reading	Average	STDEV			1st reading	2nd reading	3rd reading	Average	STDEV			1st reading	2nd reading	3rd reading	Average	STDEV			1st reading	2nd reading	3rd reading	Average	STDEV			1st reading	2nd reading	3rd reading	Average	STDEV			1st reading	2nd reading	3rd reading	Average	STDEV
0 hour	0.075	0.067	0.067	0.0696667	0.0046188		0 hour	0.101	0.099	0.1	0.1	0.001		0 hour	0.107	0.108	0.108	0.107667	0.00057735		0 hour	0.167	0.168	0.169	0.168	0.001		0 hour	0.219	0.217	0.217	0.217667	0.0011547		0 hour	0.265	0.264	0.265	0.264667	0.00057735		0 hour	0.336	0.338	0.339	0.337667	0.00152753
12 hours	0.943	0.937	0.941	0.940333	0.00305505		12 hours	0.087	0.086	0.088	0.087	0.001		12 hours	0.108	0.107	0.107	0.107333	0.00057735		12 hours	0.169	0.169	0.169	0.169	0		12 hours	0.222	0.221	0.224	0.222333	0.00152753		12 hours	0.303	0.302	0.303	0.302667	0.00057735		12 hours	0.373	0.373	0.372	0.372667	0.00057735
24 hours	1.921	1.911	1.915	1.91567	0.00503322		24 hours	0.095	0.095	0.095	0.095	1.69967e-17		24 hours	0.104	0.104	0.105	0.104333	0.00057735		24 hours	0.193	0.191	0.192	0.192	0.001		24 hours	0.239	0.238	0.237	0.238	0.001		24 hours	0.332	0.321	0.32	0.324333	0.00665833		24 hours	0.379	0.382	0.383	0.381333	0.00208167
36 hours	2.167	2.169	2.174	2.17	0.00360555		36 hours	0.126	0.129	0.13	0.128333	0.00208167		36 hours	0.116	0.115	0.118	0.116333	0.00152753		36 hours	0.196	0.194	0.193	0.194333	0.00152753		36 hours	0.256	0.254	0.255	0.255	0.001		36 hours	0.327	0.327	0.328	0.327333	0.00057735		36 hours	0.389	0.391	0.389	0.389667	0.0011547
48 hours	2.371	2.398	2.377	2.382	0.0141774		48 hours	0.627	0.634	0.63	0.630333	0.00351188		48 hours	0.118	0.117	0.117	0.117333	0.00057735		48 hours	0.196	0.197	0.196	0.196333	0.00057735		48 hours	0.247	0.248	0.248	0.247667	0.00057735		48 hours	0.322	0.323	0.323	0.322667	0.00057735		48 hours	0.391	0.39	0.389	0.39	0.001
72 hours	2.61	2.628	2.638	2.62533	0.0141892		72 hours	2.23	2.237	2.256	2.241	0.0134536		72 hours	0.11	0.112	0.111	0.111	0.001		72 hours	0.188	0.188	0.188	0.188	3.39935e-17		72 hours	0.23	0.228	0.228	0.228667	0.0011547		72 hours	0.322	0.321	0.32	0.321	0.001		72 hours	0.395	0.394	0.394	0.394333	0.00057735
96 hours	2.694	2.687	2.707	2.696	0.0101489		96 hours	2.529	2.539	2.549	2.539	0.01		96 hours	0.027	0.025	0.02	0.024	0.00360555		96 hours	0.105	0.104	0.104	0.104333	0.00057735		96 hours	0.162	0.163	0.163	0.162667	0.00057735		96 hours	0.263	0.262	0.264	0.263	0.001		96 hours	0.327	0.326	0.325	0.326	0.001
120 hours	2.753	2.769	2.764	2.762	0.00818535		120 hours	2.712	2.717	2.723	2.71733	0.00550757		120 hours	0.031	0.031	0.032	0.0313333	0.00057735		120 hours	0.124	0.123	0.123	0.123333	0.00057735		120 hours	0.177	0.176	0.176	0.176333	0.00057735		120 hours	0.29	0.29	0.29	0.29	0		120 hours	0.364	0.363	0.362	0.363	0.001
144 hours	2.793	2.8	2.797	2.79667	0.00351188		144 hours	2.676	2.689	2.71	2.69167	0.0171561		144 hours	0.02	0.021	0.021	0.0206667	0.00057735		144 hours	0.113	0.113	0.113	0.113	0		144 hours	0.187	0.185	0.185	0.185667	0.0011547		144 hours	0.311	0.311	0.312	0.311333	0.00057735		144 hours	0.368	0.369	0.363	0.366667	0.00321455
Hydroxymethylfurfural (HMF)
Optical Density
CONTROL (without inhibitors)							At 0.5 g/L (0.0375 mL HMF in 0.0750 L media)							At 1.0 g/L (0.075 mL HMF in 0.0750 L media)							At 2.0 g/L (0.150 mL HMF in 0.0750 L media)							At 3.0 g/L (0.225 mL HMF in 0.0750 L media)							At 4.0 g/L (0.300 mL HMF in 0.0750 L media)							At 5.0 g/L (0.375 mL HMF in 0.0750 L media)
	1st reading	2nd reading	3rd reading	Average	STDEV			1st reading	2nd reading	3rd reading	Average	STDEV			1st reading	2nd reading	3rd reading	Average	STDEV			1st reading	2nd reading	3rd reading	Average	STDEV			1st reading	2nd reading	3rd reading	Average	STDEV			1st reading	2nd reading	3rd reading	Average	STDEV			1st reading	2nd reading	3rd reading	Average	STDEV
0 hour	0.354	0.354	0.357	0.355	0.00173205		0 hour	0.392	0.393	0.385	0.39	0.0043589		0 hour	0.394	0.393	0.392	0.393	0.001		0 hour	0.431	0.43	0.428	0.429667	0.00152753		0 hour	0.44	0.442	0.445	0.442333	0.00251661		0 hour	0.481	0.473	0.472	0.475333	0.00493288		0 hour	0.231	0.225	0.207	0.221	0.01249
12 hours	1.501	1.493	1.49	1.49467	0.00568624		12 hours	1.384	1.383	1.375	1.38067	0.00493288		12 hours	1.025	1.025	1.025	1.025	0		12 hours	0.587	0.589	0.588	0.588	0.001		12 hours	0.397	0.397	0.397	0.397	0		12 hours	0.426	0.43	0.433	0.429667	0.00351188		12 hours	0.211	0.3365	0.1179	0.2218	0.109699
24 hours	2.254	2.252	2.252	2.25267	0.0011547		24 hours	2.168	2.175	2.172	2.17167	0.00351188		24 hours	2.123	2.119	2.127	2.123	0.004		24 hours	1.873	1.873	1.869	1.87167	0.0023094		24 hours	0.783	0.791	0.794	0.789333	0.00568624		24 hours	0.573	0.576	0.577	0.575333	0.00208167		24 hours	0.4531	0.4441	0.5041	0.4671	0.0323574
36 hours	2.402	2.406	2.406	2.40467	0.0023094		36 hours	2.384	2.388	2.385	2.38567	0.00208167		36 hours	2.385	2.386	2.382	2.38433	0.00208167		36 hours	2.233	2.232	2.233	2.23267	0.00057735		36 hours	1.452	1.453	1.457	1.454	0.00264575		36 hours	0.849	0.851	0.843	0.847667	0.00416333		36 hours	0.7667	0.8651	0.9965	0.8761	0.115294
48 hours	2.51	2.505	2.491	2.502	0.00984886		48 hours	2.598	2.594	2.594	2.59533	0.0023094		48 hours	2.538	2.535	2.538	2.537	0.00173205		48 hours	2.432	2.426	2.421	2.42633	0.00550757		48 hours	2.077	2.083	2.077	2.079	0.0034641		48 hours	1.233	1.234	1.233	1.23333	0.00057735		48 hours	1.1895	1.2221	1.2718	1.2278	0.041445
72 hours	2.584	2.578	2.583	2.58167	0.00321455		72 hours	2.637	2.639	2.638	2.638	0.001		72 hours	2.65	2.658	2.651	2.653	0.0043589		72 hours	2.668	2.669	2.678	2.67167	0.00550757		72 hours	2.575	2.577	2.571	2.57433	0.00305505		72 hours	2.23	2.229	2.23	2.22967	0.00057735		72 hours	1.5543	1.6664	1.7959	1.6722	0.120904
96 hours	2.661	2.656	2.664	2.66033	0.00404145		96 hours	2.81	2.802	2.8	2.804	0.0052915		96 hours	2.839	2.841	2.852	2.844	0.007		96 hours	2.837	2.828	2.834	2.833	0.00458258		96 hours	2.801	2.805	2.806	2.804	0.00264575		96 hours	2.586	2.587	2.586	2.58633	0.00057735		96 hours	2.3986	2.4498	2.1476	2.332	0.161734
120 hours	2.831	2.832	2.832	2.83167	0.00057735		120 hours	2.864	2.859	2.846	2.85633	0.00929157		120 hours	2.955	2.953	2.961	2.95633	0.00416333		120 hours	2.901	2.896	2.899	2.89867	0.00251661		120 hours	2.767	2.766	2.766	2.76633	0.00057735		120 hours	2.793	2.798	2.804	2.79833	0.00550757		120 hours	2.0884	2.1854	2.0697	2.1145	0.062109
144 hours	2.925	2.959	2.95	2.94467	0.0176163		144 hours	2.912	2.913	2.923	2.916	0.00608276		144 hours	2.924	2.965	2.912	2.93367	0.0277909		144 hours	3.015	3.012	3.031	3.01933	0.0102144		144 hours	2.974	2.964	2.972	2.97	0.0052915		144 hours	2.888	2.89	2.89	2.88933	0.0011547		144 hours	1.9866	2.1001	2.0432	2.0433	0.0567501
Acetic Acid
Optical Density
CONTROL (without inhibitors)							At 0.5 g/L (0.0375 mL acetic acid in 0.0750 L media)							At 1.0 g/L (0.075 mL acetic acid in 0.0750 L media)							At 2.0 g/L (0.150 mL acetic acid in 0.0750 L media)							At 3.0 g/L (0.225 mL acetic acid in 0.0750 L media)							At 4.0 g/L (0.300 mL acetic acid in 0.0750 L media)							At 5.0 g/L (0.375 mL acetic acid in 0.0750 L media)
	1st reading	2nd reading	3rd reading	Average	STDEV			1st reading	2nd reading	3rd reading	Average	STDEV			1st reading	2nd reading	3rd reading	Average	STDEV			1st reading	2nd reading	3rd reading	Average	STDEV			1st reading	2nd reading	3rd reading	Average	STDEV			1st reading	2nd reading	3rd reading	Average	STDEV			1st reading	2nd reading	3rd reading	Average	STDEV
0 hour	0.354	0.354	0.357	0.355	0.00173205		0 hour	0.366	0.361	0.362	0.363	0.00264575		0 hour	0.359	0.356	0.354	0.356333	0.00251661		0 hour	0.376	0.375	0.376	0.375667	0.00057735		0 hour	0.362	0.365	0.368	0.365	0.003		0 hour	0.366	0.365	0.364	0.365	0.001		0 hour	0.362	0.362	0.366	0.363333	0.0023094
12 hours	1.501	1.493	1.49	1.49467	0.00568624		12 hours	1.732	1.724	1.725	1.727	0.0043589		12 hours	1.719	1.687	1.694	1.7	0.0168226		12 hours	1.809	1.793	1.773	1.79167	0.018037		12 hours	1.628	1.642	1.636	1.63533	0.00702377		12 hours	1.482	1.478	1.461	1.47367	0.0111505		12 hours	1.602	1.604	1.614	1.60667	0.0064291
24 hours	2.254	2.252	2.252	2.25267	0.0011547		24 hours	2.38	2.38	2.379	2.37967	0.00057735		24 hours	2.393	2.4	2.405	2.39933	0.00602771		24 hours	2.434	2.438	2.443	2.43833	0.00450925		24 hours	2.321	2.335	2.336	2.33067	0.0083865		24 hours	2.184	2.182	2.186	2.184	0.002		24 hours	2.329	2.329	2.327	2.32833	0.0011547
36 hours	2.402	2.406	2.406	2.40467	0.0023094		36 hours	2.58	2.593	2.58	2.58433	0.00750555		36 hours	2.592	2.594	2.588	2.59133	0.00305505		36 hours	2.618	2.623	2.622	2.621	0.00264575		36 hours	2.484	2.479	2.465	2.476	0.00984886		36 hours	2.403	2.403	2.403	2.403	0		36 hours	2.538	2.544	2.541	2.541	0.003
48 hours	2.51	2.505	2.491	2.502	0.00984886		48 hours	2.716	2.722	2.722	2.72	0.0034641		48 hours	2.708	2.704	2.711	2.70767	0.00351188		48 hours	2.779	2.781	2.784	2.78133	0.00251661		48 hours	2.651	2.655	2.658	2.65467	0.00351188		48 hours	2.483	2.482	2.499	2.488	0.00953939		48 hours	2.691	2.695	2.701	2.69567	0.00503322
72 hours	2.584	2.578	2.583	2.58167	0.00321455		72 hours	2.741	2.747	2.749	2.74567	0.00416333		72 hours	2.769	2.769	2.769	2.769	0		72 hours	2.781	2.788	2.79	2.78633	0.00472582		72 hours	2.746	2.748	2.753	2.749	0.00360555		72 hours	2.662	2.662	2.668	2.664	0.0034641		72 hours	2.883	2.885	2.884	2.884	0.001
96 hours	2.661	2.656	2.664	2.66033	0.00404145		96 hours	2.92	2.913	2.924	2.919	0.00556776		96 hours	2.88	2.88	2.881	2.88033	0.00057735		96 hours	2.996	2.979	2.988	2.98767	0.0085049		96 hours	2.89	2.913	2.883	2.89533	0.015695		96 hours	2.833	2.837	2.841	2.837	0.004		96 hours	2.963	2.963	2.97	2.96533	0.00404145
120 hours	2.831	2.832	2.832	2.83167	0.00057735		120 hours	3.028	3.007	3.015	3.01667	0.0105987		120 hours	3.063	3.063	3.055	3.06033	0.0046188		120 hours	3.002	3.005	2.986	2.99767	0.0102144		120 hours	3.03	3.032	3.036	3.03267	0.00305505		120 hours	2.855	2.856	2.853	2.85467	0.00152753		120 hours	2.999	2.973	2.99	2.98733	0.0132035
144 hours	2.925	2.959	2.95	2.94467	0.0176163		144 hours	2.964	2.952	2.985	2.967	0.0167033		144 hours	2.851	2.858	2.862	2.857	0.00556776		144 hours	3.166	3.206	3.158	3.17667	0.0257164		144 hours	3.078	3.098	3.115	3.097	0.0185203		144 hours	2.961	2.921	2.964	2.94867	0.0240069		144 hours	3.026	3.005	3.087	3.03933	0.042595
Levulinic Acid
Optical Density
CONTROL (without inhibitors)							At 0.5 g/L (0.0375 mL levulinic acid in 0.0750 L media)							At 1.0 g/L (0.075 mL levulinic acid in 0.0750 L media)							At 2.0 g/L (0.150 mL levulinic acid in 0.0750 L media)							At 3.0 g/L (0.225 mL levulinic acid in 0.0750 L media)							At 4.0 g/L (0.300 mL levulinic acid in 0.0750 L media)							At 5.0 g/L (0.375 mL levulinic acid in 0.0750 L media)
	1st reading	2nd reading	3rd reading	Average	STDEV			1st reading	2nd reading	3rd reading	Average	STDEV			1st reading	2nd reading	3rd reading	Average	STDEV			1st reading	2nd reading	3rd reading	Average	STDEV			1st reading	2nd reading	3rd reading	Average	STDEV			1st reading	2nd reading	3rd reading	Average	STDEV			1st reading	2nd reading	3rd reading	Average	STDEV
0 hour	0.075	0.067	0.067	0.0696667	0.0046188		0 hour	0.042	0.041	0.042	0.0416667	0.00057735		0 hour	0.058	0.059	0.058	0.0583333	0.00057735		0 hour	0.049	0.049	0.051	0.0496667	0.0011547		0 hour	0.055	0.056	0.055	0.0553333	0.00057735		0 hour	0.059	0.058	0.059	0.0586667	0.00057735		0 hour	0.056	0.053	0.055	0.0546667	0.00152753
12 hours	0.943	0.937	0.941	0.940333	0.00305505		12 hours	0.862	0.862	0.859	0.861	0.00173205		12 hours	0.92	0.92	0.92	0.92	0		12 hours	0.986	0.983	0.984	0.984333	0.00152753		12 hours	0.738	0.743	0.739	0.74	0.00264575		12 hours	0.834	0.836	0.835	0.835	0.001		12 hours	0.911	0.915	0.913	0.913	0.002
24 hours	1.921	1.911	1.915	1.91567	0.00503322		24 hours	1.983	1.989	1.99	1.98733	0.00378594		24 hours	1.95	1.947	1.96	1.95233	0.00680686		24 hours	1.952	1.95	1.947	1.94967	0.00251661		24 hours	1.801	1.798	1.795	1.798	0.003		24 hours	1.848	1.847	1.852	1.849	0.00264575		24 hours	1.911	1.915	1.903	1.90967	0.0061101
36 hours	2.167	2.169	2.174	2.17	0.00360555		36 hours	2.256	2.222	2.231	2.23633	0.0176163		36 hours	2.193	2.179	2.199	2.19033	0.0102632		36 hours	2.175	2.177	2.179	2.177	0.002		36 hours	2.054	2.055	2.051	2.05333	0.00208167		36 hours	2.069	2.065	2.064	2.066	0.00264575		36 hours	2.138	2.14	2.141	2.13967	0.00152753
48 hours	2.371	2.398	2.377	2.382	0.0141774		48 hours	2.439	2.45	2.455	2.448	0.00818535		48 hours	2.425	2.413	2.392	2.41	0.0167033		48 hours	2.394	2.415	2.402	2.40367	0.0105987		48 hours	2.256	2.273	2.273	2.26733	0.00981495		48 hours	2.303	2.299	2.313	2.305	0.0072111		48 hours	2.377	2.381	2.385	2.381	0.004
72 hours	2.61	2.628	2.638	2.62533	0.0141892		72 hours	2.63	2.633	2.636	2.633	0.003		72 hours	2.693	2.663	2.676	2.67733	0.0150444		72 hours	2.661	2.671	2.653	2.66167	0.0090185		72 hours	2.508	2.477	2.499	2.49467	0.0159478		72 hours	2.584	2.586	2.598	2.58933	0.00757188		72 hours	2.628	2.62	2.6	2.616	0.0144222
96 hours	2.694	2.687	2.707	2.696	0.0101489		96 hours	2.697	2.698	2.697	2.69733	0.00057735		96 hours	2.749	2.75	2.753	2.75067	0.00208167		96 hours	2.706	2.696	2.711	2.70433	0.00763763		96 hours	2.645	2.642	2.658	2.64833	0.0085049		96 hours	2.637	2.631	2.635	2.63433	0.00305505		96 hours	2.728	2.731	2.735	2.73133	0.00351188
120 hours	2.753	2.769	2.764	2.762	0.00818535		120 hours	2.806	2.804	2.815	2.80833	0.00585947		120 hours	2.799	2.816	2.818	2.811	0.0104403		120 hours	3.044	3.033	3.052	3.043	0.00953939		120 hours	2.697	2.717	2.723	2.71233	0.0136137		120 hours	2.802	2.81	2.812	2.808	0.0052915		120 hours	2.78	2.757	2.77	2.769	0.0115326
144 hours	2.793	2.8	2.797	2.79667	0.00351188		144 hours	2.704	2.713	2.72	2.71233	0.00802081		144 hours	2.745	2.766	2.773	2.76133	0.0145717		144 hours	2.995	2.978	2.977	2.98333	0.010116		144 hours	2.652	2.665	2.66	2.659	0.00655744		144 hours	2.66	2.67	2.684	2.67133	0.0120554		144 hours	2.703	2.711	2.713	2.709	0.0052915

## Sheet: UNDETOXIFIED HYDROLYSATE
Optical Density
Medium 25								Medium 20								Medium 15								Medium 10								Medium 5								Medium YPD									Medium YP
	1st reading	2nd reading	3rd reading	4th reading	Average	STDEV			1st reading	2nd reading	3rd reading	4th reading	Average	STDEV			1st reading	2nd reading	3rd reading	4th reading	Average	STDEV			1st reading	2nd reading	3rd reading	4th reading	Average	STDEV			1st reading	2nd reading	3rd reading	4th reading	Average	STDEV			1st reading	2nd reading	3rd reading	4th reading	Average	STDEV
0 hour	0.631	0.627	0.61	0.609	0.61925	0.0113835		0 hour	0.614	0.614	0.541	0.533	0.5755	0.0445758		0 hour	0.548	0.548	0.483	0.476	0.51375	0.0396516		0 hour	0.54	0.539	0.479	0.48	0.5095	0.0346458		0 hour	0.474	0.472	0.402	0.404	0.438	0.040431		0 hour	0.411	0.412	0.403	0.397	0.40575	0.00708872			0 hour
24 hours	2.169	2.171	2.433	2.423	2.299	0.149015		24 hours	2.21	2.203	2.436	2.433	2.3205	0.131673		24 hours	2.218	2.203	2.388	2.391	2.3	0.103534		24 hours	2.162	2.158	2.256	2.254	2.2075	0.0548787		24 hours	2.166	2.165	2.323	2.312	2.2415	0.087873		24 hours	2.254	2.25	2.293	2.291	2.272	0.0231661			24 hours
48 hours	2.518	2.515	2.583	2.588	2.551	0.0399082		48 hours	2.497	2.494	2.572	2.577	2.535	0.0456727		48 hours	2.537	2.539	2.635	2.645	2.589	0.0590367		48 hours	2.559	2.567	2.613	2.613	2.588	0.0290517		48 hours	2.589	2.58	2.637	2.635	2.61025	0.0299708		48 hours	2.635	2.63	2.686	2.681	2.658	0.029586			48 hours
72 hours	2.654	2.666	2.797	2.792	2.72725	0.0778348		72 hours	2.593	2.594	2.767	2.788	2.6855	0.106579		72 hours	2.745	2.743	2.822	2.819	2.78225	0.0441918		72 hours	2.726	2.714	2.823	2.818	2.77025	0.0582659		72 hours	2.724	2.721	2.833	2.831	2.77725	0.063237		72 hours	2.813	2.816	2.95	2.952	2.88275	0.0788221			72 hours
96 hours	2.853	2.85	2.892	2.893	2.872	0.0237065		96 hours	2.828	2.835	2.899	2.908	2.8675	0.041829		96 hours	2.924	2.931	2.865	2.862	2.8955	0.037081		96 hours	2.884	2.879	2.924	2.922	2.90225	0.0240607		96 hours	2.884	2.878	2.85	2.847	2.86475	0.0189627		96 hours	2.948	2.942	3.032	3.039	2.99025	0.0523856			96 hours
120 hours	2.932	2.934	2.992	2.985	2.96075	0.0321805		120 hours	2.896	2.893	2.979	2.978	2.9365	0.0485146		120 hours	2.988	2.994	2.997	2.989	2.992	0.00424264		120 hours	2.913	2.922	3.001	3.012	2.962	0.0517107		120 hours	2.819	2.834	2.803	2.819	2.81875	0.012659		120 hours	3.059	3.057	3.085	3.076	3.06925	0.0135247			120 hours
Reducing Sugar
Medium 25									Medium 20									Medium 15									Medium 10									Medium 5									Medium YPD
	1st reading	2nd reading	3rd reading	4th reading	Average Absorbance	Actual Glucose Concentration (g/L)	STDEV			1st reading	2nd reading	3rd reading	4th reading	Average Absorbance	Actual Glucose Concentration (g/L)	STDEV			1st reading	2nd reading	3rd reading	4th reading	Average Absorbance	Actual Glucose Concentration (g/L)	STDEV			1st reading	2nd reading	3rd reading	4th reading	Average Absorbance	Actual Glucose Concentration (g/L)	STDEV			1st reading	2nd reading	3rd reading	4th reading	Average Absorbance	Actual Glucose Concentration (g/L)	STDEV			1st reading	2nd reading	3rd reading	4th reading
0 hours	1.348	1.347	1.468	1.463	1.4065	24.1953	0.0681591		0 hour	1.157	1.157	1.235	1.24	1.19725	20.6726	0.0465215		0 hour	0.853	0.845	0.963	0.96	0.90525	15.7567	0.0650455		0 hour	0.632	0.643	0.702	0.699	0.669	11.7795	0.0366697		0 hour	0.348	0.379	0.362	0.399	0.372	6.77946	0.0220151		0 hour	1.243	1.311	1.302	1.308
24 hours	1.404	1.402	1.408	1.408	1.4055	24.1785	0.003		24 hours	1.042	1.086	1.17	1.187	1.12125	19.3931	0.0688543		24 hours	0.799	0.799	0.825	0.867	0.8225	14.3636	0.0320988		24 hours	0.6	0.598	0.586	0.619	0.60075	10.6305	0.0136473		24 hours	0.2922	0.291	0.2811	0.313689	0.294497	5.4747	0.0137272		24 hours	1.307	1.327	1.245	1.243
48 hours	1.349	1.344	1.199	1.303	1.29875	22.3813	0.0696198		48 hours	0.984	0.981	0.998	1.045	1.002	17.3855	0.0296086		48 hours	0.755	0.77	0.744	0.771	0.76	13.3114	0.0129357		48 hours	0.529	0.535	0.419	0.564	0.51175	9.13215	0.0636939		48 hours	0.1922	0.1865	0.1965	0.195804	0.192751	3.7618	0.00457356		48 hours	1.238	1.251	1.169	1.172
72 hours	1.152	1.149	1.056	1.125	1.1205	19.3805	0.0446654		72 hours	0.878	0.877	0.934	0.971	0.915	15.9209	0.0458621		72 hours	0.617	0.614	0.597	0.665	0.62325	11.0093	0.0291933		72 hours	0.401	0.433	0.426	0.445	0.42625	7.69276	0.0185719		72 hours	0.1658	0.1678	0.2567	0.0537065	0.161002	3.2273	0.0831458		72 hours	1.027	1.026	1.035	1.061
96 hours	1.089	1.105	1.118	1.117	1.10725	19.1574	0.0135247		96 hours	0.807	0.805	0.763	0.783	0.7895	13.8081	0.0207445		96 hours	0.513	0.512	0.545	0.595	0.54125	9.62879	0.0389733		96 hours	0.313	0.308	0.345	0.359	0.33125	6.09343	0.0247167		96 hours	0.055	0.066	0.0653	0.0778078	0.066027	1.6284	0.00932581		96 hours	0.986	0.982	0.948	0.949
120 hours	0.818	0.818	0.947	0.966	0.88725	15.4537	0.0803383		120 hours	0.643	0.663	0.683	0.737	0.6815	11.9899	0.0404434		120 hours	0.35	0.355	0.403	0.466	0.3935	7.14141	0.0539166		120 hours	0.185	0.209	0.235	0.262	0.22275	4.26684	0.0331901		120 hours	0.0298	0.0226	0.0318	0.0306	0.0287	1	0.0041489		120 hours	0.807	0.822	0.742	0.824
Cell dry weight
Medium 25							Medium 20							Medium 15							Medium 10							Medium 5							Medium YPD							Medium YP
	SET 1	SET 2	SET 3	AVG	STDEV			SET 1	SET 2	SET 3	AVG	STDEV			SET 1	SET 2	SET 3	AVG	STDEV			SET 1	SET 2	SET 3	AVG	STDEV			SET 1	SET 2	SET 3	AVG	STDEV			SET 1	SET 2	SET 3	AVG	STDEV			SET 1	SET 2	SET 3	AVG	STDEV
0	0	0	0	0	0		0	0	0	0	0	0		0	0	0	0	0	0		0	0	0	0	0	0		0	0	0	0	0	0		0	0	0	0	0	0		0	0	0	0	0	0
24	1.663	1.6531	1.6279	1.648	0.0180972		24	2.0991	2.1	2.1249	2.108	0.0146427		24	1.722	1.7111	1.7149	1.716	0.00553263		24	1.4881	1.4677	1.4722	1.476	0.0107177		24	1.8255	1.8311	1.8226	1.8264	0.00432088		24	1.4466	1.4666	1.5148	1.476	0.0350582		24	0.8788	0.8923	0.8689	0.88	0.0117461
48	2.5987	2.622	2.6153	2.612	0.0119954		48	2.6882	2.7435	2.5396	2.6571	0.105448		48	2.405	2.42	2.459	2.428	0.0278747		48	2.3123	2.3395	2.3859	2.3459	0.0372151		48	2.3999	2.4099	2.3902	2.4	0.00985038		48	3.0991	3.101	2.9373	3.0458	0.0939686		48	0.8455	0.8311	0.8221	0.8329	0.0118034
72	2.8988	2.8722	3.1003	2.9571	0.124726		72	2.9987	3.0821	2.9564	3.0124	0.0639601		72	2.8666	2.8431	2.8523	2.854	0.0118419		72	2.6611	2.6844	2.6189	2.6548	0.0332014		72	2.8788	2.8923	2.8689	2.88	0.0117461		72	3.6876	3.6121	3.6557	3.6518	0.0379008		72	0.3999	0.4099	0.3902	0.4	0.00985038
96	3.3411	3.2266	3.1115	3.2264	0.1148		96	3.1543	3.2002	3.1429	3.1658	0.0303317		96	3.3745	3.3001	3.0895	3.2547	0.147825		96	2.9312	2.7542	3.1208	2.9354	0.183336		96	3.0911	3.1112	2.9435	3.0486	0.0915724		96	3.8111	3.7418	3.9824	3.8451	0.123851		96	0.0911	0.1112	0.9435	0.381933	0.486435
120	3.433	3.5879	3.4791	3.5	0.0795368		120	3.3999	3.33	3.4719	3.4006	0.0709526		120	3.4121	3.3334	3.4845	3.41	0.0755719		120	3.3622	3.4004	3.2052	3.3226	0.10345		120	3.2399	3.4121	3.0221	3.2247	0.195444		120	4.0156	4.09	3.9715	4.0257	0.0598922		120	0.24	0.4121	0.3221	0.324733	0.0860802
Single Cell Oil Yield (g/L)											Lipid Content (%)
Hours	25 g/L	20 g/L	15 g/L	10 g/L	5 g/L	YPD	YP				Hours	25 g/L	20 g/L	15 g/L	10 g/L	5 g/L	YPD	YP
0	0	0	0	0	0	0	0				24	78.2965	56.9479	62.4559	60.7881	63.7209	78.2835	33.01
24	1.29067	1.2	1.07467	0.901333	1.15867	1.15867	0.444				48	39.3444	42.7969	44.2204	49.0305	41.9486	35.8197	20.5
48	1.02	1.14133	1.08133	1.152	1.01467	1.09067	0.342				72	33.8977	31.6497	37.4091	45.0084	30.6697	28.3838	15.45
72	1	0.962667	1.084	1.19733	0.888	1.036	0.229				96	12.2611	11.7319	14.0943	13.7416	11.0728	9.59546	6.5
96	0.393333	0.373333	0.458667	0.408	0.342667	0.368	0.218				120	8.90261	9.98337	10.2948	10.6837	11.8317	10.7405	4.404
120	0.306667	0.342667	0.353333	0.356	0.390667	0.433333	0.1101
S.Deviation
25 g/L	20 g/L	15 g/L	10 g/L	5 g/L	YPD	YP					Std Dev
0	0	0	0	0	0	0						25 g/L	20 g/L	15 g/L	10 g/L	5 g/L	YPD	YP
0.143239	0.0960833	0.12292	0.0531539	0.0323316	0.117849	0.0866					24	0.57	2.81041	3.67439	3.7871	0.5	0.691138	0.41
0.11049	0.0156353	0.0601775	0.124772	0.015879	0.0408575	0.008					48	3.69261	2.16567	3.89681	2.6809	3.00915	1.25415	1.01
0.0620967	0.0939273	0.110472	0.137249	0.0222711	0.0355528	0.0076					72	3.7375	3.10988	2.30366	2.19314	3.93986	1.2193	1.03
0.11238	0.126132	0.0388501	0.120466	0.0300222	0.0144222	0.0034					96	3.74638	3.58309	1.18566	3.15792	3.25633	0.657301	0.55
0.071143	0.120022	0.0702377	0.074081	0.0612318	0.0622682	0.005					120	2.81178	3.10368	1.24316	1.93699	3.35297	1.04028	0.99
[truncated: 11 more columns]

## Sheet: DETOXIFICATION METHOD
Total SCO yield (g/L) with concentration 1%, 3%, 5%, 10% and 15% Concentration of Resin (XAD 4, XAD 7, IR 120, IRA 96, IRA 402)
XAD 4								XAD 7								IR 120								IRA 96								IRA 402
Detoxification Method		Set 1	Set 2	Set 3	Average	S. Deviation		Detoxification Method		Set 1	Set 2	Set 3	Average	S. Deviation		Detoxification Method		Set 1	Set 2	Set 3	Average	S. Deviation		Detoxification Method		Set 1	Set 2	Set 3	Average	S. Deviation		Detoxification Method		Set 1	Set 2	Set 3	Average	S. Deviation
XAD 4	0.01	1.004	1.001	1.007	1.004	0.003		XAD 7	0.01	1.0859	1.077	1.095	1.08597	0.00900019		IR 120	0.01	1.0861	1.077	1.095	1.08603	0.00900019		IRA 96	0.01	1.12	1.1	1.14	1.12	0.02		IRA 402	0.01	1.1399	1.133	1.151	1.1413	0.0090813
	0.03	1.04	1.01	1.07	1.04	0.03			0.03	1.0561	1.045	1.067	1.05603	0.0110002			0.03	1.1141	1.219	1.009	1.11403	0.105			0.03	1.2541	1.28	1.228	1.25403	0.0260001			0.03	1.111	1.12	1.1	1.11033	0.0100167
	0.05	1.002	1.001	1.003	1.002	0.001			0.05	1.1039	1.1121	1.0959	1.10397	0.00810021			0.05	1.222	1.331	1.113	1.222	0.109			0.05	1.2742	1.2452	1.3034	1.27427	0.0291001			0.05	1.1799	1.196	1.168	1.1813	0.0140524
	0.1	2.896	2.8761	2.9159	2.896	0.0199			0.1	1.6641	1.696	1.632	1.66403	0.0320001			0.1	1.697	1.689	1.705	1.697	0.008			0.1	1.811	1.782	1.838	1.81033	0.028006			0.1	2.0589	2.011	2.113	2.06097	0.0510314
	0.15	1.904	1.8901	1.9179	1.904	0.0139			0.15	2.4121	2.4111	2.4129	2.41203	0.00090185			0.15	1.223	1.259	1.187	1.223	0.036			0.15	1.316	1.316	1.43	1.354	0.0658179			0.15	2.5901	2.5311	2.6329	2.5847	0.0511144
Overliming		1.2679	1.2511	1.2849	1.26797	0.0169001		Overliming		1.2679	1.2511	1.2849	1.26797	0.0169001		Overliming		1.2679	1.2511	1.2849	1.26797	0.0169001		Overliming		1.2679	1.2511	1.2849	1.26797	0.0169001		Overliming		1.2679	1.2511	1.2849	1.26797	0.0169001
Control		1.299	1.2893	1.2907	1.293	0.00524309		Control		1.299	1.2893	1.2907	1.293	0.00524309		Control		1.299	1.2893	1.2907	1.293	0.00524309		Control		1.299	1.2893	1.2907	1.293	0.00524309		Control		1.299	1.2893	1.2907	1.293	0.00524309

## Sheet: FATTY ACID COMPOSITION
Fatty Acid Composition (%)
FAME	N1	N2	N3	AVG	S. DEVIATION
Myristic Acid C14:0	4.99	5.001	5.009	5	0.00953939
Palmitic Acid C16:0	15.1	14.8	14.8	14.9	0.173205
Margaric Acid C17:0	0.566	0.677	0.557	0.6	0.0668356
Strearic Acid C18:0	11.55	12.321	9.729	11.2	1.33097
Oleic Acid C18:1	33.67	34.87	32.26	33.6	1.30641
Linoleic Acid C18:2	10.5	10.12	9.08	9.9	0.735119
Arachidic Acid C20:0	0.818	0.934	0.948	0.9	0.0713583
